# Prevalence of pregnancy termination and associated factors among married women in Papua New Guinea: a nationally representative cross-sectional survey

McKenzie Maviso<sup>1\*</sup>, Paula Zebedee Aines<sup>2</sup>, Gracelyn Potjepat<sup>2</sup>, Nancy Geregl<sup>3</sup>, Glen D.L. Mola<sup>4</sup>, John W. Bolnga<sup>5</sup>

<sup>1</sup>Division of Public Health, School of Medicine and Health Sciences, University of Papua New Guinea, Port Moresby, Papua New Guinea

<sup>2</sup>Division of Nursing, School of Medicine and Health Sciences, University of Papua New Guinea, Port Moresby, Papua New Guinea

<sup>3</sup>School of Health Sciences, Pacific Adventist University, Port Moresby, Papua New Guinea

<sup>4</sup>Department of Obstetrics and Gynaecology, School of Medicine and Health Sciences, University of Papua New Guinea, Port Moresby, Papua New Guinea

<sup>5</sup>Department of Obstetrics and Gynaecology, Modilon Hospital, Madang, Papua New Guinea

\*Corresponding author: [mckenzie.maviso@upng.ac.pg](mailto:mckenzie.maviso@upng.ac.pg)

# Prevalence of pregnancy termination and associated factors among married women in Papua New Guinea: a nationally representative cross-sectional survey

## Abstract

### Background

Pregnancy termination or induced abortion is not decriminalized, and access to safe abortion services is largely unavailable in Papua New Guinea (PNG). However, the practice is common throughout the country. This study aimed to estimate the prevalence and determine factors associated with pregnancy termination among married women aged 15–49 in PNG.

### Methods

Secondary data from the 2016–2018 PNG Demographic and Health Survey (PNGDHS) was used. A total weighted samples of 6,288 married women were included. Complex Sample Analysis method was used to account for the cluster design and sample weight of the study. Chi-square tests and multivariable logistic regression were used to assess factors associated with pregnancy termination. Adjusted odds ratios (aORs) with 95% Confidence Intervals (CIs) were reported.

### Results

The prevalence of pregnancy termination was 5.3%. Nearly half (45.2%) of all pregnancy terminations occurred in the Highlands region. Women aged 35–44 years (aOR = 8.54; 95% CI: 1.61–45.26), not working (aOR = 6.17; 95% CI: 2.26–16.85), owned a mobile phone (aOR = 3.77; 95% CI: 1.60–8.84), and lived in urban areas (aOR = 5.66; 95% CI: 1.91–16.81) were more likely of pregnancy termination. Women who experienced intimate partner violence (IPV) were 2.27 times (aOR = 2.27; 95% CI: 1.17–4.41) more likely to terminate a pregnancy compared to those who did not experience IPV. Women with unplanned pregnancies were 6.23 times (aOR = 6.23; 95% CI: 2.61–14.87) more likely to terminate a pregnancy. Women who knew about modern contraceptive methods and made independent decisions for contraceptive use were 3.38 and 2.54

times (aOR = 3.38; 95% CI: 1.39–8.18 and aOR = 2.54; 95% CI: 1.18–5.45, respectively) more likely to terminate a pregnancy.

## Conclusion

The findings highlight the role of sociodemographic and maternal factors in pregnancy termination among married women in PNG. Maternal age, occupation, mobile phone ownership, place of residence, IPV, unplanned pregnancy, knowledge of modern contraceptive methods, and decision-maker for contraceptive use were significantly associated with pregnancy termination. Efforts aimed at reducing unplanned pregnancies and terminations should focus on improving easy access to contraceptives and comprehensive sexual and reproductive health education for married couples. Post-abortion care should also be integrated into the country's legal framework and added as an important component of existing sexual and reproductive health services.

## Introduction

While every pregnancy sets a woman at risk of death, the vulnerability to disability and maternal mortality is greater among women whose pregnancies are terminated through induced abortions, miscarriages, or stillbirths than among those who have live births [1,2]. Pregnancy termination, also known as induced abortion, is a medical or surgical intervention that involves removing a viable fetus, whereas spontaneous abortions (or miscarriages), occur when an embryo or fetus is lost due to natural causes [3]. In addition, induced abortion is permitted when there are compelling reasons, such as to save a woman's life, prevent adverse physical and mental health outcomes, avoid pregnancy following rape or incest, prevent serious fetal anomalies, socioeconomic reasons, or a woman's request [4–6]. Conversely, unsafe abortion is the termination of pregnancy performed by unskilled persons in an environment lacking primary medical and standard sanitary conditions, or both [7].

Recent global data showed that between 2015 and 2019, an estimated 121 million pregnancies that occurred were unintended [8]. Of these unintended pregnancies, 61% (73.3

million) resulted in abortion, consistent with a global abortion rate of 39 per 1,000 women aged 15–49 years [8]. An estimated 45% of all abortions are unsafe, and 97% occur in low- and middle-income countries (LMICs) [4,8]. Likewise, about 4.7–13.2% of all global maternal deaths each year are attributed to unsafe abortion [4,9]. Disability and deaths associated with unsafe pregnancy termination persist as a public health burden, particularly in settings where health disparities are evident, and/or abortion laws are restrictive [8,10,11]. Similarly, in countries where patriarchal societies, cultural norms, religious beliefs, and economic factors influence women's decisions, pregnancy termination is never easy [12–14]. The practice remains prevalent in low- and middle-income countries (LMICs), where women of reproductive age (15–49 years) have high rates of unmet contraceptive needs [8,15]. On average, women in these countries have more pregnancies throughout their lifetime, and their risk of pregnancy-related disability and mortality remains higher than those living in high-income countries [8]. Unintended pregnancy can have substantial social, economic, psychological, and health consequences for women of reproductive age and their families [16–18].

Many countries still confront health challenges due to the complexity of abortion laws and poor abortion healthcare services, and even where abortions are legal, the policies are hindered by the practice or incoherence [11,19]. Unsafe abortion has adverse health and economic implications for individuals and society [9,20]. Studies have revealed that unintended pregnancy has substantial social, economic, psychological, and health consequences for women of reproductive age and their families [16–18]. An earlier World Health Organization (WHO) systematic analysis highlighted five primary complications that accounted for 75% of all pregnancy-related deaths, which include hemorrhage, infection, pre-eclampsia and eclampsia, birth complications, and unsafe abortion [9]. It can also be aggravated by specific predisposing co-morbidities such as obesity, asthma, diabetes, and hypertension in women with a higher risk of pregnancy termination [21–24].

Despite the high risk of disability and death, the choice to undergo a pregnancy termination is personal and may be affected by several circumstance-specific considerations and healthcare

services. For instance, evidence from population-based surveys in LMICs revealed that demographic (e.g., age, marital status, parity, education), socioeconomic (e.g., employment), health risk behaviors (e.g., substance abuse, sexual activities), and sociocultural (e.g., gender norms, belief systems) factors are associated with pregnancy termination [10,14,25]. Previous experience with pregnancy termination, access to reproductive health services, and attitudes towards this practice have also been well documented [13,25]. Along with adverse health and socioeconomic consequences, decision-making regarding pregnancy termination is problematic, notably where patriarchy, restricted abortion laws, cultural and religious beliefs, and economic factors may impact women's decisions, especially in resource-constrained settings with already overloaded health systems [11].

In PNG, the risk of maternal and neonatal deaths due to pregnancy- and childbirth-related complications is disproportionately higher compared to other countries in the Western Pacific region [26,27]. The maternal mortality ratio is estimated to be 215–545 deaths per 100,000 live births [26,28]. Sepsis due to unsafe abortion is one of the leading causes of maternal mortality after hemorrhage in the country [27,29]. Regarding contraceptive use, the country has a low prevalence rate for modern contraceptive methods among married women (31%), and a high unmet need for family planning (26%) [30].

While pregnancy termination or induced abortion for socioeconomic reasons or upon request is prohibited under PNG's *Criminal Code Act 1974* [31], it is performed by a professional medical practitioner under certain conditions; for example, if the pregnancy is caused by rape or incest, if continuing the pregnancy places a woman's life or her physical or mental health at significant risk, or the child may experience a severe physical abnormality or disease [31].

Nonetheless, this practice continues to be contested in the country, with vested interests from politically and religiously conservative spheres, patriarchal societies, and sociocultural belief systems [31,32]. Moreover, the majority of women are unaware of the legal implications following pregnancy termination, especially illegal and unsafe abortion, which is known to be widely

performed in the country [33–35]. Evidence from PNG sources suggests that many women of reproductive age (15–49 years) with unplanned pregnancies perform unsafe abortions, which may result in abortion-related morbidity and mortality [26,29,33,36]. Previous reviews in the Eastern Highlands Province found that unsafe abortion infection accounted for 48% of maternal mortality [29], and 24% of women who sought post-abortion care were due to unsafe abortions [35]. Another study in Madang found that more than three-quarters (76.5%) of abortion-related admissions were due to continuous bleeding following an induced abortion [37]. Pregnancy-related complications, including unsafe abortion practices, contribute to the country’s poor maternal health indicators.

Considering the morbidity and mortality associated with the complications of pregnancy terminations, particularly unsafe abortions in PNG, it is imperative to fully understand the prevalence and associated factors to adequately address this issue. Although a few studies have determined the factors associated with pregnancy termination, country-level estimates of the prevalence and their determinants are largely undetermined, affecting a significant proportion of women in the reproductive age group [14]. Therefore, this study aimed to estimate the prevalence and determine factors associated with pregnancy termination among married women aged 15–49 in PNG. This could encourage program planning and policy development to establish a well-defined legal framework for implementing abortion services in the country.

## **Materials and methods**

### **Study setting**

This study used secondary data from the PNG Demographic and Health Survey (PNGDHS), a nationally representative population-based survey conducted across the four major administrative regions (Southern, Highlands, Momase, and Islands) from October 2016 to December 2018.

## Study design and data source

Data were drawn from the PNGDHS 2016–2018, conducted every five years, employing a stratified two-stage cluster sampling design. In the first stage, census blocks are selected with systematic proportional and stratified sampling by urban and rural areas (except for the National Capital District, which does not have rural areas). In the second stage, a fixed number of 24 households per cluster are selected with an equal probability of systematic selection. A total of 17,505 households were selected for the sample, of which 16,754 were occupied. Of the occupied households, 16,021 were interviewed. In the interviewed households, 18,175 women were identified for interviews, and 15,198 women participated successfully, yielding a response rate of 84%. The data used in the analyses were weighted to explain variations in the probability of selection and non-response. In this study, a weighted sub-sample consisted of 6,288 married women aged 15–49 years who were married or in a formal union and who had ever been pregnant with complete cases on all of the variables studied were included. Women with missing information, never been married, and never had sex were excluded from the study because they had no risk of terminating a pregnancy (Fig 1). Detailed sampling procedures have been reported [30].

**Fig 1.** Flowchart of participant selection for this study.

## Definition of variables

### Dependent variable

The dependent variable for this study was pregnancy termination. Women were asked whether they had ever terminated a pregnancy. Information about the dependent variable was generated from this question. Respondents provided a “yes” or “no” as a response to the question to indicate whether they had ever terminated a pregnancy or not. Based on their responses, a dichotomous response of

‘Yes’ was coded ‘1’ when a woman reported that she had terminated a pregnancy, and ‘No’ was coded ‘0’ if she had not.

## **Independent variables**

The independent variables were selected based on their availability in the dataset, practical significance, and theoretical relevance reported in the literature about pregnancy termination [14,38,39]. Variables were categorized into maternal, household, and maternal health-related characteristics. Maternal characteristics include age, educational level, literacy, occupation, mobile phone ownership, internet use, and place of residence. Household characteristics include the husband’s age, educational level, and occupation, the household wealth index, and the number of children living. Additionally, participants were asked whether they had experienced intimate partner violence (IPV) during their pregnancies. Their responses were categorized as having experienced IPV due to one or more of the following: being humiliated, threatened, insulted, pushed, slapped, punched with a fist, or hit with an object; being kicked, burned, threatened, or attacked with a knife; being twisted; being physically forced to have sexual intercourse; being physically forced to have any other sexual act; or performing any sexual acts against their will during pregnancy [30]. Maternal health-related characteristics include the last pregnancy being planned, knowledge of modern contraceptive methods, decision-maker for contraceptive use, knowledge of the menstrual cycle, number of antenatal visits, births in the last three years, and birth order.

## **Operational definition**

Pregnancy termination or induced abortion: a pregnancy that is terminated by choice through an intervention. For this study, the terms pregnancy termination and abortion are used interchangeably.

## **Statistical analysis**

Analyses were restricted to participants with complete data for the variables of interest. Sample weights were used in all analyses to adjust for disproportionate sampling and obtain reliable estimates and standard errors. Descriptive statistics were computed to report frequencies and

percentages of the sample's characteristics. The Chi-square test of independence was used to assess the association between the dependent and independent variables. Variables with a  $p < 0.2$  in the bivariate analysis were retained and included in the multivariate logistic regression analysis. The variance inflation factor was used to check for multicollinearity, and there was no evidence of multicollinearity. The model's fitness was checked using Hosmer and Lemeshow [40]. To account for the multistage sampling design and sample weight, a complex samples analysis technique was used, which provided generalizable and accurate estimates of proportion, probability values, and odds ratios [41]. Adjusted odds ratios (aORs) with 95% confidence intervals (Cis) were reported. A  $p\text{-value} \leq 0.05$  was considered statistically significant. Analyses were performed using IBM SPSS Statistics for Windows, Version 26.0 (IBM Corp., Armonk, NY, USA).

## **Ethical considerations**

Permission to access the datasets was obtained from the DHS Program and was only used for this study and not shared with a third party. The Institutionalized Review Board (IRB), the DHS survey implementing agency, and the IRB in host countries approved the survey protocols, ensuring ethical conduct in accordance with human subject research. Further ethical approval for this study was not required since data are available in the public domain (<https://dhsprogram.com/>). Written informed consent was obtained from the participants before each interview [30]. All the information about the participants had been anonymized before accessing the dataset for final analysis.

## **Results**

### **Characteristics of the study participants**

A total of 6,288 married women were included in the study. The mean age was  $29.13 (\pm 9.61)$  years. Nearly half of the women were aged 25–34 (47.9%) and had primary education (49.1%). The majority of them lived in rural areas (80.6%) and were not working (66.8%). Over half (51.9%)

reported that they had experienced IPV from their husbands. Most women who planned their last pregnancies (80.6%) knew about modern contraceptive methods (86.4) and had menstrual cycle knowledge (77.7%). Similarly, over half (59.6%) of them made a joint decision (with their husbands) about contraceptive use and had one pregnancy (63.3%) in the past three years preceding the survey (Table 1).

**Table 1. Characteristics of the study participants (N = 6,288)**

| Characteristics                     | Frequency (n) | Percent (%) |
|-------------------------------------|---------------|-------------|
| <i>Maternal factors</i>             |               |             |
| Age (years)                         |               |             |
| 15–24                               | 1,536         | 24.4        |
| 25–34                               | 3,010         | 47.9        |
| 35–44                               | 1,561         | 24.8        |
| 45–49                               | 181           | 2.9         |
| Mean age (SD) = 29.13 ( $\pm$ 9.61) |               |             |
| Educational level                   |               |             |
| No formal education                 | 1,612         | 25.6        |
| Primary                             | 3,082         | 49.1        |
| Secondary                           | 1,336         | 21.2        |
| Higher                              | 258           | 4.1         |
| Literacy (n = 6,259)                |               |             |
| Cannot read/write                   | 2,312         | 36.9        |
| Can read/write                      | 3,947         | 63.1        |
| Occupation                          |               |             |
| Not working                         | 4,199         | 66.8        |
| Working                             | 2,089         | 33.2        |
| Tobacco/cigarette smoking           |               |             |
| No                                  | 4,920         | 78.2        |
| Yes                                 | 1,368         | 21.8        |
| Mobile phone ownership              |               |             |
| No                                  | 4,362         | 69.4        |
| Yes                                 | 1,926         | 30.6        |
| Place of residence                  |               |             |
| Urban                               | 703           | 11.2        |
| Rural                               | 5,586         | 88.8        |

|                                               |       |      |
|-----------------------------------------------|-------|------|
| <b><i>Household factors</i></b>               |       |      |
| Age of husband (years) (n = 3,917)            |       |      |
| 15–24                                         | 312   | 8.0  |
| 25–34                                         | 1,371 | 35.0 |
| 35–44                                         | 1,308 | 33.4 |
| 45 or more                                    | 925   | 23.6 |
| Educational level (husband) (n = 4,252)       |       |      |
| No formal education                           | 920   | 21.6 |
| Primary                                       | 1,929 | 45.4 |
| Secondary                                     | 1,165 | 27.4 |
| Higher                                        | 237   | 5.6  |
| Occupation (husband) (n = 5,583)              |       |      |
| Not working                                   | 2,773 | 49.7 |
| Working                                       | 2,809 | 50.3 |
| Wealth index                                  |       |      |
| Poorest                                       | 1,335 | 21.2 |
| Poorer                                        | 1,246 | 19.8 |
| Middle                                        | 1,245 | 19.8 |
| Richer                                        | 1,250 | 19.9 |
| Richest                                       | 1,212 | 19.3 |
| Number of children living                     |       |      |
| 1                                             | 1,461 | 23.2 |
| 2                                             | 1,293 | 20.6 |
| 3 or more                                     | 3,533 | 56.2 |
| Intimate partner violence (IPV) (n = 2,500)   |       |      |
| No                                            | 1,203 | 48.1 |
| Yes                                           | 1,297 | 51.9 |
| <b><i>Maternal health-related factors</i></b> |       |      |
| Last pregnancy planned                        |       |      |
| No                                            | 1,216 | 19.3 |
| Yes                                           | 5,072 | 80.7 |
| Knowledge of modern contraceptive methods     |       |      |
| No                                            | 855   | 13.6 |
| Yes                                           | 5,433 | 86.4 |
| Knowledge of the ovulatory cycle              |       |      |
| No                                            | 1,401 | 22.3 |
| Yes                                           | 4,887 | 77.7 |

|                                                  |       |      |
|--------------------------------------------------|-------|------|
| Decision-maker for contraceptive use (n = 1,646) |       |      |
| Respondent                                       | 454   | 27.6 |
| Husband/partner                                  | 199   | 12.0 |
| Joint decision                                   | 993   | 60.4 |
| Number of antenatal visits (n = 2,655)           |       |      |
| No visits                                        | 642   | 24.2 |
| 1–3                                              | 563   | 21.2 |
| 4 or more                                        | 1,450 | 54.6 |
| Birth order                                      |       |      |
| 1 <sup>st</sup>                                  | 1,356 | 21.6 |
| 2 <sup>nd</sup>                                  | 1,246 | 19.8 |
| 3 <sup>rd</sup>                                  | 1,178 | 18.7 |
| 4 <sup>th</sup> or more                          | 2,508 | 39.9 |
| Births in the last 3 years (n = 1,627)           |       |      |
| 1                                                | 3,978 | 85.4 |
| 2                                                | 658   | 14.1 |
| 3                                                | 25    | 0.5  |

## Prevalence of pregnancy termination

The prevalence of pregnancy termination was 5.3% (95% CI: 0.05–0.06) among married women of reproductive age (15–49 years) in PNG. When compared to the three administrative regions, the rates of pregnancy termination remained high in the Highlands (45.2%) (Fig 2).

**Fig 2.** The rates of pregnancy terminations by region in PNG.

## Bivariate analysis of factors of pregnancy termination

Among women who had terminated a pregnancy, half (50.7%) of them were between the ages of 25 to 34 years. Many (42.6%) had primary education, while 53% were unemployed. Similarly, 43% of women's husbands had primary education, and 64.3% were employed. The majority (71.5%) experienced intimate partner violence. Less than half (46.2%) of the respondents made independent decisions regarding contraceptive use. The Chi-square analysis revealed that maternal age,

250 educational level, occupation, mobile phone ownership, internet use, place of residence, husband's  
 251 occupation, household wealth index, number of children living, IPV experience, knowledge of  
 252 modern contraceptive methods, decision-maker for contraceptive use, menstrual cycle knowledge,  
 253 births in the last three years, and birth order were found to be statistically significant factors of  
 254 pregnancy termination (Table 2).  
 255

**Table 2. Bivariate analysis of factors of pregnancy termination (N = 6,288)**

| Characteristics           | Pregnancy termination |             |            |            | p-value*         |
|---------------------------|-----------------------|-------------|------------|------------|------------------|
|                           | No                    | %           | Yes        | %          |                  |
| <b>Sample</b>             | <b>5,948</b>          | <b>94.7</b> | <b>340</b> | <b>5.3</b> |                  |
| <i>Maternal factors</i>   |                       |             |            |            |                  |
| Age (years)               |                       |             |            |            | <b>0.023</b>     |
| 15–24                     | 1,473                 | 24.8        | 63         | 18.6       |                  |
| 25–34                     | 2,837                 | 47.7        | 172        | 50.7       |                  |
| 35–44                     | 1,463                 | 24.6        | 98         | 28.9       |                  |
| 45–49                     | 175                   | 2.9         | 6          | 1.8        |                  |
| Educational level         |                       |             |            |            | <b>&lt;0.001</b> |
| No formal education       | 1,558                 | 26.2        | 54         | 15.9       |                  |
| Primary                   | 2,937                 | 49.4        | 145        | 42.6       |                  |
| Secondary                 | 1,246                 | 20.9        | 90         | 26.5       |                  |
| Higher                    | 207                   | 3.5         | 51         | 15.0       |                  |
| Literacy (n = 6,259)      |                       |             |            |            | <b>&lt;0.001</b> |
| Cannot read/write         | 2,220                 | 37.5        | 92         | 27.1       |                  |
| Can read/write            | 3,700                 | 62.5        | 247        | 72.9       |                  |
| Occupation                |                       |             |            |            | <b>&lt;0.001</b> |
| Not working               | 4,019                 | 67.6        | 180        | 52.9       |                  |
| Working                   | 1,929                 | 32.4        | 160        | 47.1       |                  |
| Tobacco/cigarette smoking |                       |             |            |            | <b>0.001</b>     |
| No                        | 4,680                 | 78.7        | 240        | 70.8       |                  |
| Yes                       | 1,268                 | 21.3        | 99         | 29.2       |                  |
| Mobile phone ownership    |                       |             |            |            | <b>&lt;0.001</b> |
| No                        | 4,159                 | 69.9        | 203        | 59.7       |                  |
| Yes                       | 1,789                 | 30.1        | 137        | 40.3       |                  |
| Place of residence        |                       |             |            |            | <b>&lt;0.001</b> |
| Urban                     | 633                   | 10.3        | 70         | 20.6       |                  |

|                                                         |       |      |     |      |        |
|---------------------------------------------------------|-------|------|-----|------|--------|
| Rural                                                   | 5,315 | 89.4 | 270 | 79.4 |        |
| <b><i>Household factors</i></b>                         |       |      |     |      |        |
| Age of husband (years) (n = 3,917)                      |       |      |     |      | 0.624  |
| 15–24                                                   | 296   | 8.0  | 17  | 8.7  |        |
| 25–34                                                   | 1,299 | 34.9 | 72  | 36.7 |        |
| 35–44                                                   | 1,251 | 33.6 | 57  | 29.1 |        |
| 45 or more                                              | 875   | 23.5 | 50  | 25.5 |        |
| Educational level of husband (n = 4,252)                |       |      |     |      | 0.320  |
| No formal education                                     | 880   | 21.8 | 40  | 18.7 |        |
| Primary                                                 | 1,837 | 45.5 | 92  | 43.0 |        |
| Secondary                                               | 1,095 | 27.1 | 70  | 32.7 |        |
| Higher                                                  | 225   | 5.6  | 12  | 5.6  |        |
| Occupation of husband (n = 5,583)                       |       |      |     |      | <0.001 |
| Not working                                             | 2,672 | 50.4 | 101 | 35.7 |        |
| Working                                                 | 2,627 | 49.6 | 182 | 64.3 |        |
| Wealth index                                            |       |      |     |      | <0.001 |
| Poorest                                                 | 1,278 | 21.5 | 58  | 17.1 |        |
| Poorer                                                  | 1,204 | 20.2 | 42  | 12.4 |        |
| Rich                                                    | 1,176 | 19.8 | 70  | 20.6 |        |
| Richer                                                  | 1,177 | 19.8 | 72  | 21.2 |        |
| Richest                                                 | 1,113 | 18.7 | 98  | 28.8 |        |
| Number of children living                               |       |      |     |      | <0.001 |
| 1                                                       | 1,418 | 23.8 | 43  | 12.7 |        |
| 2                                                       | 1,219 | 20.5 | 74  | 21.8 |        |
| 3 or more                                               | 3,311 | 55.7 | 222 | 65.5 |        |
| Experienced intimate partner violence (IPV) (n = 2,500) |       |      |     |      | <0.001 |
| No                                                      | 1,158 | 49.4 | 45  | 28.5 |        |
| Yes                                                     | 1,184 | 50.6 | 113 | 71.5 |        |
| <b><i>Maternal health-related factors</i></b>           |       |      |     |      |        |
| Last pregnancy planned                                  |       |      |     |      | 0.306  |
| No                                                      | 1,143 | 19.2 | 73  | 21.5 |        |
| Yes                                                     | 4,805 | 80.8 | 267 | 78.5 |        |
| Knowledge of modern contraceptive methods               |       |      |     |      | <0.001 |
| No                                                      | 840   | 14.1 | 15  | 4.4  |        |
| Yes                                                     | 5,10  | 85.9 | 325 | 95.6 |        |
| Knowledge of the ovulatory cycle                        |       |      |     |      | 0.025  |
| No                                                      | 1,342 | 22.6 | 59  | 17.4 |        |

|                                                  |       |      |     |      |                  |
|--------------------------------------------------|-------|------|-----|------|------------------|
| Yes                                              | 4,606 | 77.4 | 281 | 82.6 |                  |
| Decision-maker for contraceptive use (n = 1,646) |       |      |     |      | <b>&lt;0.001</b> |
| Respondent                                       | 405   | 26.2 | 48  | 47.1 |                  |
| Husband/partner                                  | 180   | 11.7 | 19  | 18.6 |                  |
| Joint decision                                   | 959   | 62.1 | 35  | 34.3 |                  |
| Number of antenatal visits (n = 2,655)           |       |      |     |      | 0.660            |
| No visits                                        | 618   | 24.3 | 24  | 21.4 |                  |
| 1–3                                              | 536   | 21.1 | 27  | 24.1 |                  |
| 4 or more                                        | 1,389 | 54.9 | 61  | 54.5 |                  |
| Birth order                                      |       |      |     |      | <b>&lt;0.001</b> |
| 1 <sup>st</sup>                                  | 1,320 | 22.2 | 36  | 10.6 |                  |
| 2 <sup>nd</sup>                                  | 1,185 | 19.9 | 61  | 17.9 |                  |
| 3 <sup>rd</sup>                                  | 1,078 | 18.1 | 100 | 29.4 |                  |
| 4 <sup>th</sup> or more                          | 2,365 | 39.8 | 143 | 42.1 |                  |
| Births in the last 3 years                       |       |      |     |      | <b>0.002</b>     |
| 1                                                | 3,779 | 85.7 | 200 | 78.7 |                  |
| 2                                                | 608   | 13.8 | 50  | 19.7 |                  |
| 3                                                | 21    | 0.5  | 4   | 1.6  |                  |

\*Chi-square test,  $p \leq 0.05$

256

## 257 **Multivariable analysis of factors associated with pregnancy** 258 **termination**

259 In the multivariable analysis, maternal age, education, occupation, mobile phone ownership, place  
260 of residence, IPV, knowledge of modern contraceptive methods, decision-maker for contraceptive  
261 use, and number of children living were significantly associated with pregnancy termination.  
262 Women aged 35–44 years (aOR = 8.54; 95% CI: 1.61–45.26), not working (aOR = 6.17; 95% CI:  
263 2.26–16.85), owned a mobile phone (aOR = 3.77; 95% CI: 1.60–8.84), and lived in urban areas  
264 (aOR = 5.66; 95% CI: 1.91–16.81) were more likely of pregnancy termination. Women who  
265 experienced IPV were 2.27 times (aOR = 2.27; 95% CI: 1.17–4.41) more likely to terminate a  
266 pregnancy compared to those who did not experience IPV. Women with unplanned pregnancies  
267 were 6.23 times (aOR = 6.23; 95% CI: 2.61–14.87) more likely to terminate a pregnancy. Women  
268 who knew about modern contraceptive methods and made independent decisions for contraceptive  
269 use were 3.38 and 2.54 times (aOR = 3.38; 95% CI: 1.39–8.18 and aOR = 2.54; 95% CI: 1.18–5.45,

270 respectively) more likely to terminate a pregnancy. However, those aged 15–24 (aOR = 0.62; 95%  
271 CI: 0.07, 5.26), had husbands not working (aOR = 0.27; 95% CI: 0.12, 0.63), had husbands making  
272 decisions for contraceptive use (aOR = 1.33; 95% CI: 0.54, 3.28), and had two children living (aOR  
273 = 0.69; 95% CI: 0.96, 5.02) were less likely to terminate a pregnancy (Table 3).

274

**Table 3. Multivariable analysis of factors associated with pregnancy termination (N = 6,288)**

| Characteristics           | cOR (95% CI)       | aOR (95% CI)       | p-value*         |
|---------------------------|--------------------|--------------------|------------------|
| Age (years)               |                    |                    | <b>&lt;0.001</b> |
| 15–24                     | 1.34 (0.47, 3.81)  | 0.62 (0.07, 5.26)  |                  |
| 25–34                     | 1.89 (0.84, 4.28)  | 1.00 (0.17, 5.95)  |                  |
| 35–44                     | 2.09 (0.94, 4.66)  | 8.54 (1.61, 45.26) |                  |
| 45–49                     | Ref                | Ref                |                  |
| Educational level         |                    |                    | 0.292            |
| No formal education       | Ref                | Ref                |                  |
| Primary                   | 1.42 (0.86, 2.34)  | 0.89 (0.30, 2.65)  |                  |
| Secondary                 | 2.07 (1.23, 3.48)  | 1.12 (0.21, 5.81)  |                  |
| Higher                    | 7.10 (2.85, 17.68) | 0.30 (0.05, 2.00)  |                  |
| Literacy                  |                    |                    | 0.523            |
| Cannot read/write         | Ref                | Ref                |                  |
| Can read/write            | 1.62 (1.11, 2.35)  | 1.44 (0.47, 4.39)  |                  |
| Occupation                |                    |                    | <b>&lt;0.001</b> |
| Not working               | 0.54 (0.37, 0.79)  | 6.17 (2.26, 16.85) |                  |
| Working                   | Ref                | Ref                |                  |
| Tobacco/cigarette smoking |                    |                    | 0.487            |
| No                        | Ref                | Ref                |                  |
| Yes                       | 1.53 (0.89, 2.63)  | 1.38 (0.55, 3.45)  |                  |
| Mobile phone ownership    |                    |                    | <b>0.002</b>     |
| No                        | Ref                | Ref                |                  |
| Yes                       | 1.57 (1.06, 2.33)  | 3.77 (1.60, 8.84)  |                  |
| Place of residence        |                    |                    | <b>0.002</b>     |
| Urban                     | 2.19 (1.53, 3.13)  | 5.66 (1.91, 16.81) |                  |
| Rural                     | Ref                | Ref                |                  |
| Occupation (husband)      |                    |                    | <b>0.003</b>     |
| Not working               | 0.54 (0.37, 0.81)  | 0.27 (0.12, 0.63)  |                  |
| Working                   | Ref                | Ref                |                  |
| Wealth index              |                    |                    | 0.113            |

|                                             |                    |                    |                  |
|---------------------------------------------|--------------------|--------------------|------------------|
| Poorest                                     | Ref                | Ref                |                  |
| Poorer                                      | 0.77 (0.41, 1.44)  | 1.17 (0.43, 3.20)  |                  |
| Rich                                        | 1.31 (0.78, 2.19)  | 0.44 (0.13, 1.44)  |                  |
| Richer                                      | 1.35 (0.79, 2.32)  | 0.19 (0.04, 0.88)  |                  |
| Richest                                     | 1.95 (1.06, 3.59)  | 0.19 (0.04, 0.98)  |                  |
| Number of children living                   |                    |                    | <b>0.033</b>     |
| 1                                           | Ref                | Ref                |                  |
| 2                                           | 1.99 (1.19, 3.32)  | 0.69 (0.96, 5.02)  |                  |
| 3 or more                                   | 2.20 (1.36, 3.57)  | 0.07 (0.01, 0.95)  |                  |
| Experienced intimate partner violence (IPV) |                    |                    | <b>0.016</b>     |
| No                                          | Ref                | Ref                |                  |
| Yes                                         | 2.48 (1.52, 4.04)  | 2.27 (1.17, 4.41)  |                  |
| Last pregnancy planned                      |                    |                    | <b>&lt;0.001</b> |
| No                                          | 1.14 (0.77, 1.69)  | 6.23 (2.61, 14.87) |                  |
| Yes                                         | Ref                | Ref                |                  |
| Knowledge of modern contraceptive methods   |                    |                    | <b>0.007</b>     |
| No                                          | Ref                | Ref                |                  |
| Yes                                         | 3.65 (1.81, 7.36)  | 3.38 (1.39, 8.18)  |                  |
| Knowledge of the ovulatory cycle            |                    |                    | 0.923            |
| No                                          | Ref                | Ref                |                  |
| Yes                                         | 1.39 (0.88, 2.20)  | 0.96 (0.41, 2.27)  |                  |
| Decision-maker for contraceptive use        |                    |                    | <b>0.05</b>      |
| Respondent                                  | 3.29 (1.19, 9.09)  | 2.54 (1.18, 5.45)  |                  |
| Husband/partner                             | 2.89 (1.26, 6.65)  | 1.33 (0.54, 3.28)  |                  |
| Joint decision                              | Ref                | Ref                |                  |
| Birth order                                 |                    |                    | 0.394            |
| 1 <sup>st</sup>                             | 0.45 (0.27, 0.74)  | 0.07 (0.03, 1.68)  |                  |
| 2 <sup>nd</sup>                             | 0.85 (0.59, 1.22)  | 0.39 (0.06, 2.54)  |                  |
| 3 <sup>rd</sup>                             | 1.54 (0.82, 2.88)  | 0.59 (0.23, 1.53)  |                  |
| 4 <sup>th</sup> or more                     | Ref                | Ref                |                  |
| Birth in the last 3 years                   |                    |                    | 0.443            |
| 1                                           | Ref                | Ref                |                  |
| 2                                           | 1.57 (0.63, 3.88)  | 0.48 (0.16, 1.48)  |                  |
| 3                                           | 3.23 (0.66, 15.73) | –                  |                  |

\*p ≤ 0.05

cOR = crude odds ratio; aOR = adjusted Odds Ratio; CI = Confidence Interval; Ref = Reference category.

## Discussion

The current study used nationally representative survey data and estimated the prevalence and determined factors of pregnancy terminations among married women of reproductive age in PNG. It was found that married women endure a disproportionate proportion of pregnancy terminations that remain prevalent in the country, despite their social and legal implications [34]. In multivariable logistic regression analysis, maternal age, maternal occupation, mobile phone ownership, place of residence, husband's occupation, IPV, pregnancy being planned, knowledge about modern contraceptive methods, and decision-maker for contraceptive use were found to be statistically significant factors in pregnancy termination.

The overall prevalence of pregnancy termination was 5.3%, with higher proportions reported from PNG's Highlands region (45.2%). The prevalence of pregnancy termination was relatively lower than that of studies from East Africa (7.8%) [39], including Ethiopia (8.5%) [10], and Sierra Leone [42]. This difference may have existed due to the study population, geography, and the accessibility and availability of sexual and reproductive health services, including maternal and child health programs over the years.

According to the study's results, being older was one of the major factors associated with pregnancy termination, particularly among women aged 35 or more. This finding was consistent with the results of prior studies conducted in 36 LMICs [14], including Ghana [43], Mozambique [43], and Sierra Leone [42], where women of advanced age had increased odds of pregnancy terminations compared to young women. A possible explanation could be that advanced maternal age predisposes women to medical and pregnancy-related complications such as pre-eclampsia, ectopic pregnancy, and gestational diabetes, including the unavoidable nature of maternal age, which may complicate pregnancy and lead to ending a pregnancy [14,44,45]. The positive association between married women and increased pregnancy termination rates could be due to the ineffectiveness or lack of contraceptive use [46]. Similarly, women who have reached their desired family size and believe they cannot get pregnant at that age have higher odds of terminating a

pregnancy. A perceived need or a lack of access to contraceptive use at the end of the reproductive years could be the possible reason [42].

The association between place of residence and pregnancy termination has received much consideration in numerous studies, demonstrating that women residing in urban areas are significantly more likely to terminate a pregnancy [10,14,37]. Compared to rural women in this study, those in urban areas were about six times more likely to terminate a pregnancy. Urban women may have access to abortion information and services, including self-induced abortion [47]. On the contrary, the lower likelihood of pregnancy termination among rural women may be elucidated by the fact that access to abortion services, including sexual and reproductive health care is inadequate because of disparities in health service and resource allocations between rural and urban areas. Similarly, restrictive gender and sociocultural norms that influence the sexual and reproductive healthcare-seeking behavior of rural women may be a possible explanation for the low prevalence of pregnancy termination.

The current study found a statistically significant relationship between pregnancy termination and occupation, with the odds higher among women who were not working. These findings are comparable to previous studies [43,48], indicating a higher concentration of pregnancy terminations among socioeconomically disadvantaged women. Women who reported pregnancy termination may do so for financial constraints, partner-related reasons, or a desire to postpone childbearing, as demonstrated by prior studies [49,50]. Moreover, financial barriers may contribute to disparities in contraceptive usage among poor women, who may not be able to afford modern contraceptives compared to working women, resulting in terminating a pregnancy. In contrast, other studies found that working women had higher probabilities of terminating a pregnancy than their unemployed counterparts [25,42,43]. Studies have argued that educated and working women are financially empowered, prioritize employment continuity, have a greater awareness of contraceptive options, and can afford abortion services [42,43].

Compared to women who do not own mobile phones, the likelihood of terminating a pregnancy remained high among those who own mobile phones. This finding is contrary to previous studies [51–53], indicating that mobile phones in health (mHealth) have been shown to influence women's perceptions and decisions on pregnancy and abortion services and improve post-abortion care, including family planning. Mobile phone use has increased considerably, along with reducing its costs, and remains a popular means to seek healthcare or obtain information about health issues [54]. In addition, women who have access to social media may be aware of the abortion laws in their country and are less likely to be stigmatized by society in their quest to have a pregnancy terminated [43]. Further research is needed to determine the relationship between the use of mobile phones and pregnancy termination among married women.

The association between IPV and pregnancy termination revealed in this study bolsters the earlier findings that being in an abusive relationship may affect women's reproductive decision-making which can result in pregnancy termination [55–57]. Married women who experienced IPV were twice as likely to terminate a pregnancy, which corroborates a recent study from PNG [58]. It has been reported that over two-thirds of PNG women have suffered some form of physical or sexual violence in their lifetime [59]. Women in abusive relationships may likely have less control over their sexuality and as a result become pregnant more often than they should, which might lead to an increase in the incidence of pregnancy terminations [56,57]. Another possible explanation could be that the husband may be unwilling to accept the child and may use violence or other coercive means to force the woman to terminate the pregnancy, or negatively influence her decision. Moreover, women experiencing IPV may have less autonomy in sexual and reproductive health and are confronting the challenges of unmet contraceptive use and unintended pregnancies [55,58,60]. While terminating a pregnancy may most likely be the woman's choice, other options for her may also be limited in an abusive relationship. An insight into socioeconomic and demographic conditions sanctioning violence remains crucial and entails women's empowerment programs. The call to reinforce the *National Strategy to Prevent and Respond to Gender-Based*

*Violence* [61], and prioritize violence prevention, along with strengthening provisions for issuing interim and long-term protection orders for survivors is necessary. Furthermore, empowering women through education and social support can enhance their self-confidence and enable them to make informed decisions about sexual and reproductive health.

In this study, unplanned pregnancy was a significant predictor associated with increased odds of pregnancy termination. This is consistent with a previous study conducted in Kenya [62]. One elucidation may be that unintended pregnancy mainly results from a lack of or inconsistent use of contraceptive methods, as reported in earlier studies [63,64]. Similarly, women may have insufficient or inaccurate knowledge and concerns about the side effects of contraception. Evidence has shown that contraception use is influenced by women's knowledge, beliefs, perceptions of health risks, and previous experience [65]. The inadequate provision of family planning services to address contraceptive needs for married women at risk of unintended pregnancies may lead to increased unwanted pregnancies, followed by pregnancy termination [65,66]. Effective contraception has several advantages, including better mother health and social and economic empowerment, while reducing the risk of an unplanned or undesired pregnancy [65]. Also, the need to improve family planning services while paying special attention, particularly for women of advanced age or those who prefer not to have children is warranted.

The current study complements the growing evidence that women who knew about modern contraceptive methods were three times more likely to terminate a pregnancy compared to their counterparts. This association corroborated recent findings in Ethiopia [10] and Nepal [67], where women with excellent contraceptive and abortion knowledge were likely to terminate a pregnancy than those with poor contraceptive knowledge. Similarly, this study found a significant association between individual decision-making regarding contraceptive use and pregnancy termination. Women who could make independent decisions about their reproductive health were more likely to terminate a pregnancy [25]. Women may foresee financial constraints associated with childrearing, social pressure against untimely pregnancies, and experiences of marital issues that encourage them

to terminate a pregnancy [58,68]. Another possible explanation could be that women who are educated and working have higher odds of decision-making power [69].

Concerning birth history, women with two or fewer children were less likely to terminate a pregnancy. This suggests that most women understand the importance of contraceptive use and have delayed childbearing or achieved the desired family size. Consistent with studies in sub-Saharan Africa [14,70], pregnancy termination rates remained low among women with fewer than four children. The probable reason may be that women with fewer children could do so due to effective contraceptive use, higher education attainment, and the probability of their involvement in income-generating activities. Another possible explanation is that women with living children may have a decreased future reproductive desire and a high intention to use contraceptives [71].

## **Strengths and limitations of the study**

The study had several strengths. Data were drawn from a nationally representative survey conducted from 2016 to 2018, which was weighted to ensure representativeness and a valid estimate. The study also employed complex samples analysis to account for the multistage sampling design used in the PNGDHS and obtain a reliable standard error and estimate. However, this survey was cross-sectional, and the results cannot be used to make causal inferences. There is also a high probability of social desirability bias, which might result in underreporting. A plausible explanation is that women may be reluctant to admit to terminating a pregnancy as it is not decriminalized and for fear of experiencing intimate partner violence from their partners, where social and cultural norms influence women's decisions [34,58]. Furthermore, the PNGDHS database did not include methods of pregnancy termination with abortifacients such as misoprostol or mifepristone or any other non-conventional methods such as traditional herbs, barks, leaves, or traumatic physical injuries. Nonetheless, the questions were generalized retrospectively to establish the prevalence of pregnancy termination only.

## Implications for policy and practice

Women who terminate a pregnancy outside the purview of the *Criminal Code Act* [31] are considered offenders in PNG. Abortion has not been decriminalized in the country, and the law only outlines the circumstances under which it will not be considered illegal. Nonetheless, the growing evidence of abortion-related complications requiring hospitalization, including disability and mortality, suggests that the practice remains prevalent and may increase. In consultation with qualified medical practitioners and professional bodies (the Professional Medical and Nursing/Midwifery Society and the National Department of Health), they need to recommend constitutional directives and reformation of the criminal law restricting access to termination of pregnancy. Furthermore, decriminalizing abortion should be viewed within a medical-legal paradigm while ensuring that the service is accessible and available to reduce adverse maternal health outcomes in the country.

## Conclusion

The findings highlight the role of sociodemographic and maternal factors in pregnancy termination among married women in PNG. Maternal age, occupation, mobile phone ownership, place of residence, IPV, unplanned pregnancy, knowledge of modern contraceptive methods, and decision-maker for contraceptive use were significantly associated with pregnancy termination. Abortion-related complications and, in some cases, deaths are due to the criminalization of this health care issue, and it is inconsistent with human rights that this should be more so for the disadvantaged, the uneducated, the lower socioeconomic strata of society, and women living in rural areas. Efforts aimed at reducing unplanned pregnancies and terminations should focus on improving easy access to contraceptives and comprehensive sexual and reproductive health education. This is crucial for increasing self-confidence and enabling them to make informed decisions about their sexual and reproductive health. Furthermore, creating an enabling environment that respects and safeguards women's access to post-abortion care is warranted. This should also be expanded to the full extent

of the country's legal framework and added as an integral component of existing sexual and reproductive health services.

## Supporting information

S1 Table. The STROBE guidelines for cross-sectional studies.

## Acknowledgments

The authors would like to thank the DHS program and its partners for permitting them to analyze the dataset.

## Author contributions

**Conceptualization:** McKenzie Maviso.

**Data curation:** McKenzie Maviso.

**Formal analysis:** McKenzie Maviso.

**Methodology:** McKenzie Maviso, Paula Zebedee Aines, Glen D.L. Mola, John W. Bolnga.

**Software:** McKenzie Maviso.

**Validation:** Paula Zebedee Aines, Gracelyn Potjepat, John W. Bolnga.

**Visualization:** McKenzie Maviso, Paula Zebedee Aines, Gracelyn Potjepat, John W. Bolnga.

**Writing – original draft:** McKenzie Maviso.

**Writing – review & editing:** McKenzie Maviso, Paula Zebedee Aines, Gracelyn Potjepat, Nancy

Geregl, Glen D.L. Mola, John W. Bolnga.

## Funding

This research received no specific grant from any funding agency in the public, commercial, or not-for-profit sectors.

## Availability of Data and Materials

Permission for accessing and analyzing the 2016–2018 PNGDHS data was obtained from the DHS Program. All data and DHS-related materials are available from the DHS team upon request at <https://dhsprogram.com/>

## Conflict of Interest

The authors have declared that no competing interests exist.

## References

1. Afiaz A, Biswas RK, Shamma R, Ananna N. Intimate partner violence (IPV) with miscarriages, stillbirths and abortions: Identifying vulnerable households for women in Bangladesh. PLOS ONE. 2020 Jul 28;15(7):e0236670.
2. Kuppusamy P, Prusty RK, Chaaithanya IK, Gajbhiye RK, Sachdeva G. Pregnancy outcomes among Indian women: increased prevalence of miscarriage and stillbirth during 2015–2021. BMC Pregnancy and Childbirth. 2023 Mar 8;23(1):150.
3. World Health Organization. Safe abortion: technical and policy guidance for health systems [Internet]. 2nd ed. Geneva: World Health Organization; 2012. Available from: <https://apps.who.int/iris/handle/10665/70914>
4. World Health Organization. Abortion: Key facts [Internet]. 2021. Available from: <https://www.who.int/news-room/fact-sheets/detail/abortion>
5. Jadav D, C Bhargava D, Meshram V, S Shekhawat R, Kanchan T. Medical termination of pregnancy: A global perspective and Indian scenario. Med Leg J. 2024 Mar;92(1):34–42.
6. Abubeker FA, Lavelanet A, Rodriguez MI, Kim C. Medical termination for pregnancy in early first trimester ( $\leq 63$  days) using combination of mifepristone and misoprostol or misoprostol alone: a systematic review. BMC Women's Health. 2020 Dec;20(1):142.
7. Gebremedhin M, Semahegn A, Usmael T, Tesfaye G. Unsafe abortion and associated factors among reproductive aged women in Sub-Saharan Africa: a protocol for a systematic review and meta-analysis. Systematic Reviews. 2018 Aug 25;7(1):130.

8. Bearak J, Popinchalk A, Ganatra B, Moller AB, Tunçalp Ö, Beavin C, et al. Unintended pregnancy and abortion by income, region, and the legal status of abortion: estimates from a comprehensive model for 1990–2019. *The Lancet Global Health*. 2020 Sep 1;8(9):e1152–61.
9. Say L, Chou D, Gemmill A, Tunçalp Ö, Moller AB, Daniels J, et al. Global causes of maternal death: a WHO systematic analysis. *The Lancet Global Health*. 2014 Jun 1;2(6):e323–33.
10. Yemane GD, Korsaa BB, Jemal SS. Multilevel analysis of factors associated with pregnancy termination in Ethiopia. *Annals of Medicine and Surgery*. 2022 Aug 1;80:104120.
11. Allotey P, Ravindran TKS, Sathivelu V. Trends in Abortion Policies in Low- and Middle-Income Countries. *Annu Rev Public Health*. 2021 Apr 1;42(1):505–18.
12. Ahinkorah BO, Seidu AA, Hagan JE, Archer AG, Budu E, Adoboi F, et al. Predictors of Pregnancy Termination among Young Women in Ghana: Empirical Evidence from the 2014 Demographic and Health Survey Data. *Healthcare*. 2021;9(6).
13. Lokubal P, Corcuera I, Balil JM, Frischer SR, Kayemba CN, Kurinczuk JJ, et al. Abortion decision-making process trajectories and determinants in low- and middle-income countries: A mixed-methods systematic review and meta-analysis. *eClinicalMedicine*. 2022 Dec 1;54:101694.
14. Ba DM, Zhang Y, Pasha-Razzak O, Khunsriraksakul C, Maiga M, Chinchilli VM, et al. Factors associated with pregnancy termination in women of childbearing age in 36 low-and middle-income countries. *PLOS Global Public Health*. 2023 Feb 28;3(2):e0001509.
15. Kantorová V. Unintended pregnancy and abortion: what does it tell us about reproductive health and autonomy? *The Lancet Global Health*. 2020 Sep 1;8(9):e1106–7.
16. Mohamed EAEB, Hamed AF, Yousef FMA, Ahmed EA. Prevalence, determinants, and outcomes of unintended pregnancy in Sohag district, Egypt. *Journal of the Egyptian Public Health Association*. 2019 Mar 13;94(1):14.
17. Omani-Samani R, Amini Rarani M, Sepidarkish M, Khedmati Morasae E, Maroufizadeh S, Almasi-Hashiani A. Socioeconomic inequality of unintended pregnancy in the Iranian population: a decomposition approach. *BMC Public Health*. 2018 May 9;18(1):607.
18. Yazdkhasti M, Pourreza A, Pirak A, Abdi F. Unintended Pregnancy and Its Adverse Social and Economic Consequences on Health System: A Narrative Review Article. *Iran J Public Health*. 2015 Jan;44(1):12–21.
19. Zhou J, Blaylock R, Harris M. Systematic review of early abortion services in low- and middle-income country primary care: potential for reverse innovation and application in the UK context. *Globalization and Health*. 2020 Sep 30;16(1):91.
20. Sahoo H, Stillman M, Frost J, Acharya R, Hussain R. Availability, practices and acceptance of postabortion contraceptive services in health facilities: A study in six states of India. *Contraception*. 2020 Feb 1;101(2):106–11.
21. Blais L, Kettani FZ, Forget A. Relationship between maternal asthma, its severity and control and abortion. *Human Reproduction*. 2013 Apr 1;28(4):908–15.
22. Cavalcante MB, Sarno M, Peixoto AB, Araujo Júnior E, Barini R. Obesity and recurrent miscarriage: A systematic review and meta-analysis. *Journal of Obstetrics and Gynaecology Research*. 2019 Jan 1;45(1):30–8.
23. Su Y, Xie X, Zhou Y, Lin H, Li Y, Feng N, et al. Association of induced abortion with hypertensive disorders of pregnancy risk among nulliparous women in China: a prospective cohort study. *Scientific Reports*. 2020 Mar 20;10(1):5128.

24. Zhao Y, Zhao Y, Fan K, Jin L. Association of History of Spontaneous or Induced Abortion With Subsequent Risk of Gestational Diabetes. *JAMA Network Open*. 2022 Mar 3;5(3):e220944–e220944.
25. Seidu AA, Ahinkorah BO, Ameyaw EK, Hubert A, Agbemavi W, Armah-Ansah EK, et al. What has women's reproductive health decision-making capacity and other factors got to do with pregnancy termination in sub-Saharan Africa? evidence from 27 cross-sectional surveys. *PLOS ONE*. 2020 Jul 23;15(7):e0235329.
26. Grundy J, Dakulala P, Wai K, Maalsen A, Whittaker M. Independent State of Papua New Guinea Health System Review. World Health Organization. Regional Office for South-East Asia; 2019.
27. Robbers G, Vogel JP, Mola G, Bolnga J, Homer CSE. Maternal and newborn health indicators in Papua New Guinea – 2008–2018. *Sexual and Reproductive Health Matters*. 2019 Jan 1;27(1):52–68.
28. Mola G, Kirby B. Discrepancies between national maternal mortality data and international estimates: the experience of Papua New Guinea. *Reproductive Health Matters*. 2013 Jan 1;21(42):191–202.
29. Sanga K, de Costa C, Mola G. A review of maternal deaths at Goroka General Hospital, Papua New Guinea 2005–2008. *Australian and New Zealand Journal of Obstetrics and Gynaecology*. 2010 Feb 1;50(1):21–4.
30. National Statistical Office (NSO) [Papua New Guinea], ICF. Papua New Guinea Demographic and Health Survey 2016-18 [Internet]. Port Moresby, Papua New Guinea, and Rockville, Maryland, USA: NSO and ICF; 2019. Available from: <https://www.dhsprogram.com/pubs/pdf/FR364/FR364.pdf>
31. Government of Papua New Guinea. Criminal Code Act 1974 pp.; Ordinance No.7 of 1902. revised 1974: Chapter 1262, parts 25,26,80. Government of Papua New Guinea; 1974.
32. Kolodziejczyk I, Kuzma J. Knowledge and Attitudes Towards Abortion and Euthanasia Among Health Students in Papua New Guinea. *Advances in Medical Education and Practice*. 2020 Dec 31;11:977–87.
33. Asa I, de Costa C, Mola G. A prospective survey of cases of complications of induced abortion presenting to Goroka hospital, Papua New Guinea, 2011. *Australian and New Zealand Journal of Obstetrics and Gynaecology*. 2012 Oct 1;52(5):491–3.
34. Kopunye F, Mola G, Woods C, de Costa C. Induced abortion in Papua-New Guinea: Experience and opinions of health professionals. *Australian and New Zealand Journal of Obstetrics and Gynaecology*. 2021 Dec 1;61(6):961–8.
35. Vallely LM, Homiehombo P, Kelly-Hanku A, Whittaker A. Unsafe abortion requiring hospital admission in the Eastern Highlands of Papua New Guinea - a descriptive study of women's and health care workers' experiences. *Reproductive Health*. 2015 Mar 21;12(1):22.
36. de Costa C, Mola G. A review of maternal deaths at Goroka General Hospital, Papua New Guinea 2005-2008. *Australian and New Zealand Journal of Obstetrics and Gynaecology*. 2009;1.
37. Bolnga JW, Lufele E, Teno M, Agua V, Ao P, DL Mola G, et al. Incidence of self-induced abortion with misoprostol, admitted to a provincial hospital in Papua New Guinea: A prospective observational study. *Australian and New Zealand Journal of Obstetrics and Gynaecology*. 2021 Dec 1;61(6):955–60.

38. Bago BJ, Hibstu DT, Woldemariam SH. Prevalence of pregnancy termination and its associated factors among women of reproductive age group in Ethiopia using 2011 Ethiopian demography and health survey, 2016. *J Preg Child Health*. 2016;4(6).
39. Hailegebreal S, Enyew EB, Simegn AE, Seboka BT, Gilano G, Kassa R, et al. Pooled prevalence and associated factors of pregnancy termination among youth aged 15–24 year women in East Africa: Multilevel level analysis. *PLOS ONE*. 2022 Dec 22;17(12):e0275349.
40. Hansen AM. Goodness-of-fit tests for autoregressive logistic regression models and generalized linear mixed models. University of California, Riverside; 2012.
41. Archer KJ, Lemeshow S, Hosmer DW. Goodness-of-fit tests for logistic regression models when data are collected using a complex sampling design. *Computational Statistics & Data Analysis*. 2007 May 15;51(9):4450–64.
42. Sesay FR, Anaba EA, Manu A, Maya E, Torpey K, Adanu RMK. Determinants of induced abortion among women of reproductive age: evidence from the 2013 and 2019 Sierra Leone Demographic and Health Survey. *BMC Women's Health*. 2023 Feb 1;23(1):44.
43. Dickson KS, Adde KS, Ahinkorah BO. Socio – economic determinants of abortion among women in Mozambique and Ghana: evidence from demographic and health survey. *Archives of Public Health*. 2018 Jul 19;76(1):37.
44. Attali E, Yogev Y. The impact of advanced maternal age on pregnancy outcome. *Best Practice & Research Clinical Obstetrics & Gynaecology*. 2021 Jan 1;70:2–9.
45. Pinheiro RL, Areia AL, Mota Pinto A, Donato H. Advanced Maternal Age: Adverse Outcomes of Pregnancy, A Meta-Analysis. *Acta Med Port*. 2019 Mar 29;32(3):219–26.
46. Eunice Ojo I, Olumuyiwa Ojo T, Okechukwu Orji E. Why do married women procure abortion? Experiences from Ile-Ife, south western Nigeria. *Afr H Sci*. 2021 Apr 16;21(1):327–37.
47. Moseson H, Jayaweera R, Raifman S, Keefe-Oates B, Filippa S, Motana R, et al. Self-managed medication abortion outcomes: results from a prospective pilot study. *Reproductive Health*. 2020 Oct 27;17(1):164.
48. Sanni Yaya, Agbessi Amouzou, Olalekan A Uthman, Michael Ekholuenetale, Ghose Bishwajit, Ogochukwu Udenigwe, et al. Prevalence and determinants of terminated and unintended pregnancies among married women: analysis of pooled cross-sectional surveys in Nigeria. *BMJ Global Health*. 2018 Mar 1;3(2):e000707.
49. Biggs MA, Gould H, Foster DG. Understanding why women seek abortions in the US. *BMC Womens Health*. 2013 Jul 5;13:29.
50. Chae S, Desai S, Crowell M, Sedgh G. Reasons why women have induced abortions: a synthesis of findings from 14 countries. *Contraception*. 2017 Oct;96(4):233–41.
51. Smith C, Vannak U, Sokhey L, Ngo TD, Gold J, Free C. Mobile Technology for Improved Family Planning (MOTIF): the development of a mobile phone-based (mHealth) intervention to support post-abortion family planning (PAFP) in Cambodia. *Reproductive Health*. 2016 Jan 5;13(1):1.
52. Gill R, Ogilvie G, Norman WV, Fitzsimmons B, Maher C, Renner R. Feasibility and Acceptability of a Mobile Technology Intervention to Support Postabortion Care in British Columbia: Phase I. *J Med Internet Res*. 2019 May 29;21(5):e13387.
53. Mangone ER, Lebrun V, Muessig KE. Mobile Phone Apps for the Prevention of Unintended Pregnancy: A Systematic Review and Content Analysis. *JMIR mHealth uHealth*. 2016 Jan 19;4(1):e6.

54. Stifani BM, Peters M, French K, Gill RK. There's an App for it: A systematic review of mobile apps providing information about abortion using a revised MARS scale. *PLOS Digital Health*. 2023 Jul 17;2(7):e0000277.
55. Arthur-Holmes F, Aboagye RG, Dadzie LK, Agbaglo E, Okyere J, Seidu AA, et al. Intimate Partner Violence and Pregnancy Termination Among Women in Sub-Saharan Africa. *J Interpers Violence*. 2023 Jan 1;38(1–2):2092–111.
56. Rahman M. Intimate partner violence and termination of pregnancy: a cross-sectional study of married Bangladeshi women. *Reproductive Health*. 2015 Nov 5;12(1):102.
57. Bagheri R, Farahani FK, Ebrahimi M. Domestic Violence and Its Impact on Abortion in Iran: Evidence From a Nationally Representative Survey. *J Interpers Violence*. 2023 Aug 1;38(15–16):9492–513.
58. Agyemang-Duah W, Asare BYA, Adu C, Agyekum AK, Peprah P. Intimate partner violence as a determinant of pregnancy termination among women in unions: evidence from the 2016–2018 Papua New Guinea Demographic and Health Survey. *Journal of Biosocial Science*. 2023/05/22 ed. 2023;1–14.
59. Darko E, Smith W, Walker D. Gender Violence in Papua New Guinea. The cost of business. 2015;
60. Ahinkorah BO, Aboagye RG, Cadri A, Salihu T, Seidu AA, Yaya S. Exposure to interparental violence and intimate partner violence among women in Papua New Guinea. *BMC Women's Health*. 2023 Feb 7;23(1):48.
61. Government of Papua New Guinea. Papua New Guinea Strategy to Prevent and Respond to Gender Based Violence 2016-2025. Government of Papua New Guinea; 2012.
62. Jayaweera RT, Ngui FM, Hall KS, Gerdtz C. Women's experiences with unplanned pregnancy and abortion in Kenya: A qualitative study. *PLOS ONE*. 2018 Jan 25;13(1):e0191412.
63. Alene M, Yismaw L, Berelie Y, Kassie B, Yeshambel R, Assemie MA. Prevalence and determinants of unintended pregnancy in Ethiopia: A systematic review and meta-analysis of observational studies. *PLOS ONE*. 2020 Apr 7;15(4):e0231012.
64. Bekele YA, Fekadu GA. Factors associated with unintended pregnancy in Ethiopia; further analysis of the 2016 Ethiopian demographic health survey data. *BMC Pregnancy and Childbirth*. 2021 Jul 6;21(1):486.
65. D'Souza P, Bailey JV, Stephenson J, Oliver S. Factors influencing contraception choice and use globally: a synthesis of systematic reviews. *The European Journal of Contraception & Reproductive Health Care*. 2022 Sep 3;27(5):364–72.
66. Ojo IE, Ojo TO, Orji EO. Why do married women procure abortion? Experiences from Ile-Ife, south western Nigeria. *Afr Health Sci*. 2021 Mar;21(1):327–37.
67. Yogi A, K.C P, Neupane S. Prevalence and factors associated with abortion and unsafe abortion in Nepal: a nationwide cross-sectional study. *BMC Pregnancy and Childbirth*. 2018 Sep 17;18(1):376.
68. Vallely LM, Homiehombo P, Kelly-Hanku A, Kumbia A, Mola GDL, Whittaker A. Hospital Admission following Induced Abortion in Eastern Highlands Province, Papua New Guinea – A Descriptive Study. *PLOS ONE*. 2014 Oct 17;9(10):e110791.
69. Demissie GD, Akalu Y, Gelagay AA, Alemnew W, Yeshaw Y. Factors associated with decision-making power of married women to use family planning in sub-Saharan Africa: a multilevel analysis of demographic health surveys. *BMC Public Health*. 2022 Apr 26;22(1):837.

70. Bolarinwa OA, Afaya A, Ajayi KV, Ojo A, Alawode OA. Prevalence and factors associated with the use of long-acting reversible and permanent contraceptive methods among women who desire no more children in high fertility countries in sub-saharan Africa. BMC Public Health. 2022 Nov 21;22(1):2141.
71. Mohammed A, Woldeyohannes D, Feleke A, Megabiaw B. Determinants of modern contraceptive utilization among married women of reproductive age group in North Shoa Zone, Amhara Region, Ethiopia. Reproductive Health. 2014 Feb 3;11(1):13.

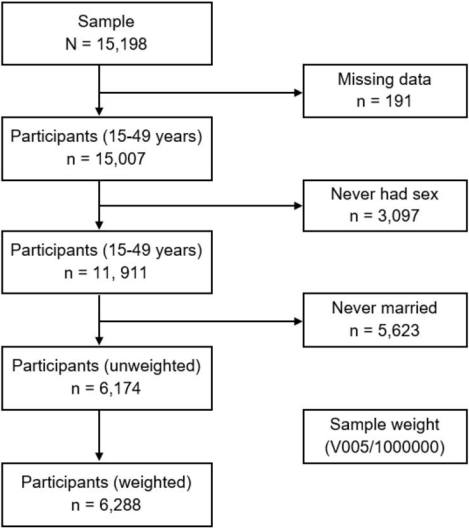

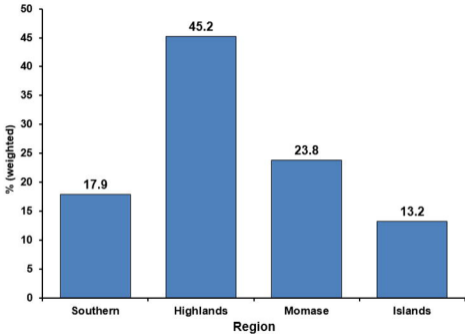

Source: https://medrxiv.org/content/medrxiv/early/2024/06/20/2024.06.19.24309129.full.pdf
